# Supplementary material for: The correlation between electrical conductivity and second-order Raman modes of laser-reduced graphene oxide
Source: Royal Society of Chemistry journal article supplement (doi:10.1039/c9cp00093c), 2019-01-01
Supplement: c9cp00093c1.pdf [file c9cp00093c1.pdf]

## **Supporting Information**

### **The correlation between electrical conductivity and second-order Raman modes of laser-reduced graphene oxide**

Bing Ma, Raul D. Rodriguez\*, Alexey Ruban, Sergey Pavlov, Evgeniya Sheremet  
Tomsk Polytechnic University, Lenina ave. 30, 634034, Tomsk, Russia

**Table S1.** The temperature thresholds for the removal of different oxygen groups in GO adapted from reference:<sup>47</sup>

| Temperature | Group                                                                                                                                                             |
|-------------|-------------------------------------------------------------------------------------------------------------------------------------------------------------------|
| ~200 °C     | Vaporization of water molecules                                                                                                                                   |
| ~200–600 °C | Removal of carboxyl groups                                                                                                                                        |
| ~800 °C     | Removal of residual carboxyl and hydroxyl groups                                                                                                                  |
| ~1000 °C    | Removal of residual hydroxyl groups, and partial removal of the epoxide group and removal of aromatic C=C bonds, which corresponds to the 50 mW irradiation power |

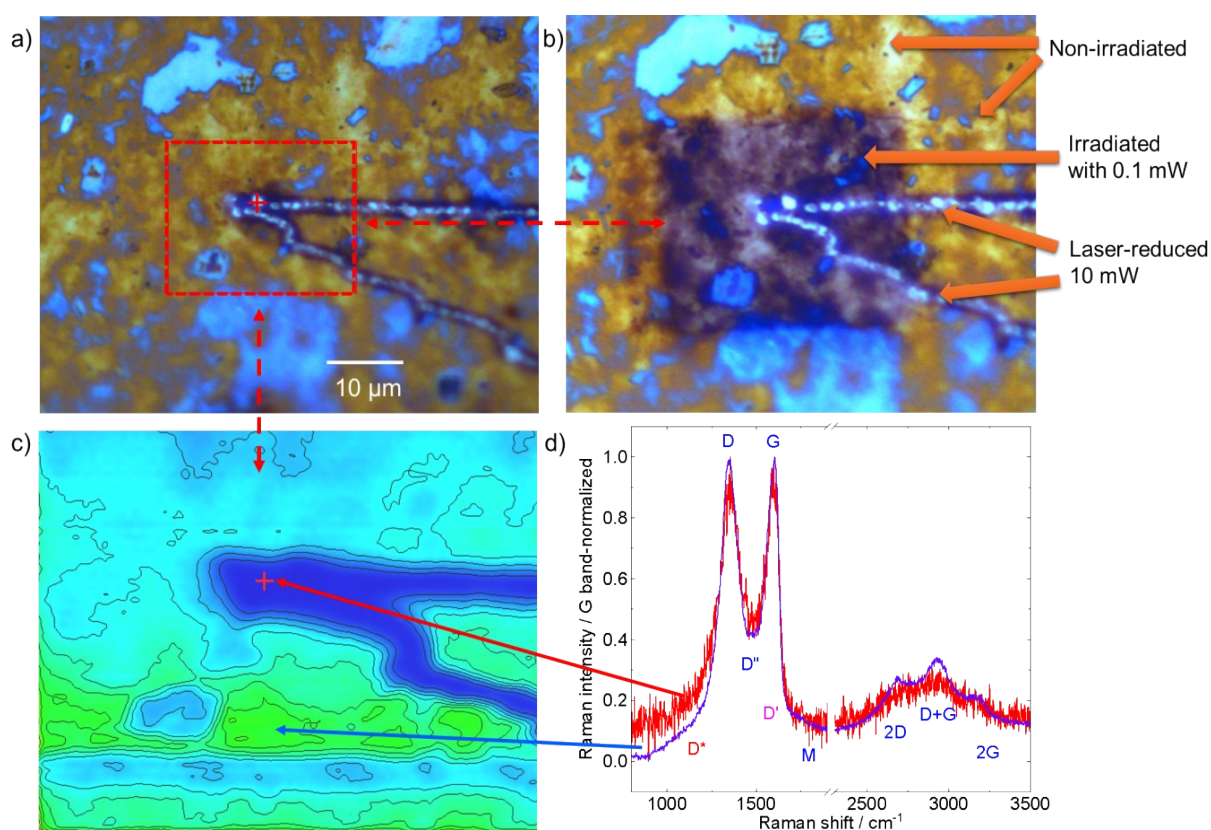

**Figure S1.** (a) Optical image of the pattern obtained at 10 mW before the Raman map. (b) Zoom out from the laser irradiated region after a Raman map at 0.1 mW laser power. (c) Raman map of the G band intensity with two representative spectra from laser-reduced and non-reduced regions shown by arrows in (d).

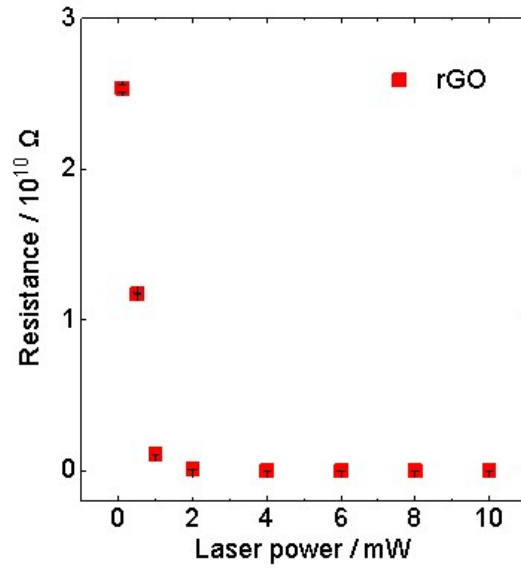

**Figure S2.** Linear plot of resistance of rGO vs. laser power

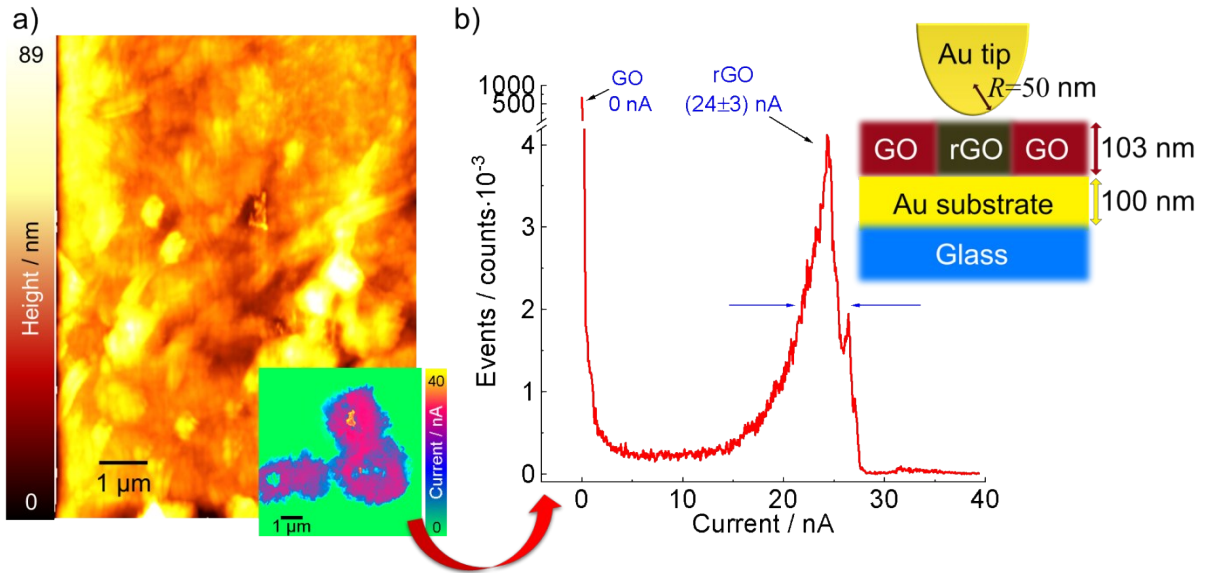

**Figure S3.** (a) The simultaneously-obtained topography image of the 8 mW laser-reduced rGO spot and the current image shown in the inset. The calculated RMS topography roughness is ca. 9 nm. (b) Histogram of the current image for the 8 mW rGO sample shown on the inset in b (and in Fig. 2d). The 0 nA current value reflects the insulator character of GO while the peak at 24 nA originates from the rGO spot conductivity with a half width of 3 nA. The inset in b shows the layer schematics of the sample with the different component sizes.

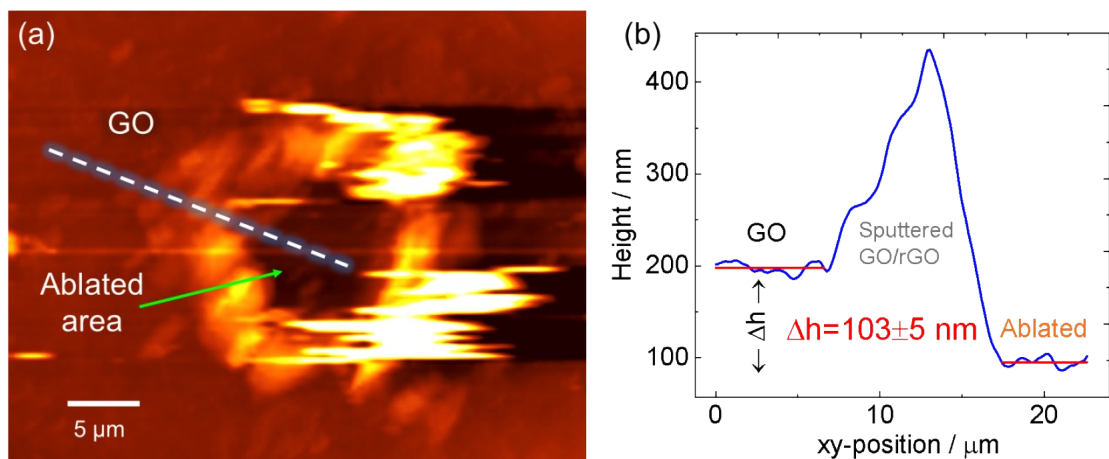

**Figure S4.** (a) Topography AFM image of a laser-ablated spot on the GO film on Au. (b) Estimation of the GO minimum thickness from a cross-section analysis from the AFM result shown in (a); the profile goes along the dashed line. The ablated region was made with a 405 nm laser and 1 W power in order to reduce the sputtering of material that resulted in the edges making AFM imaging unstable.

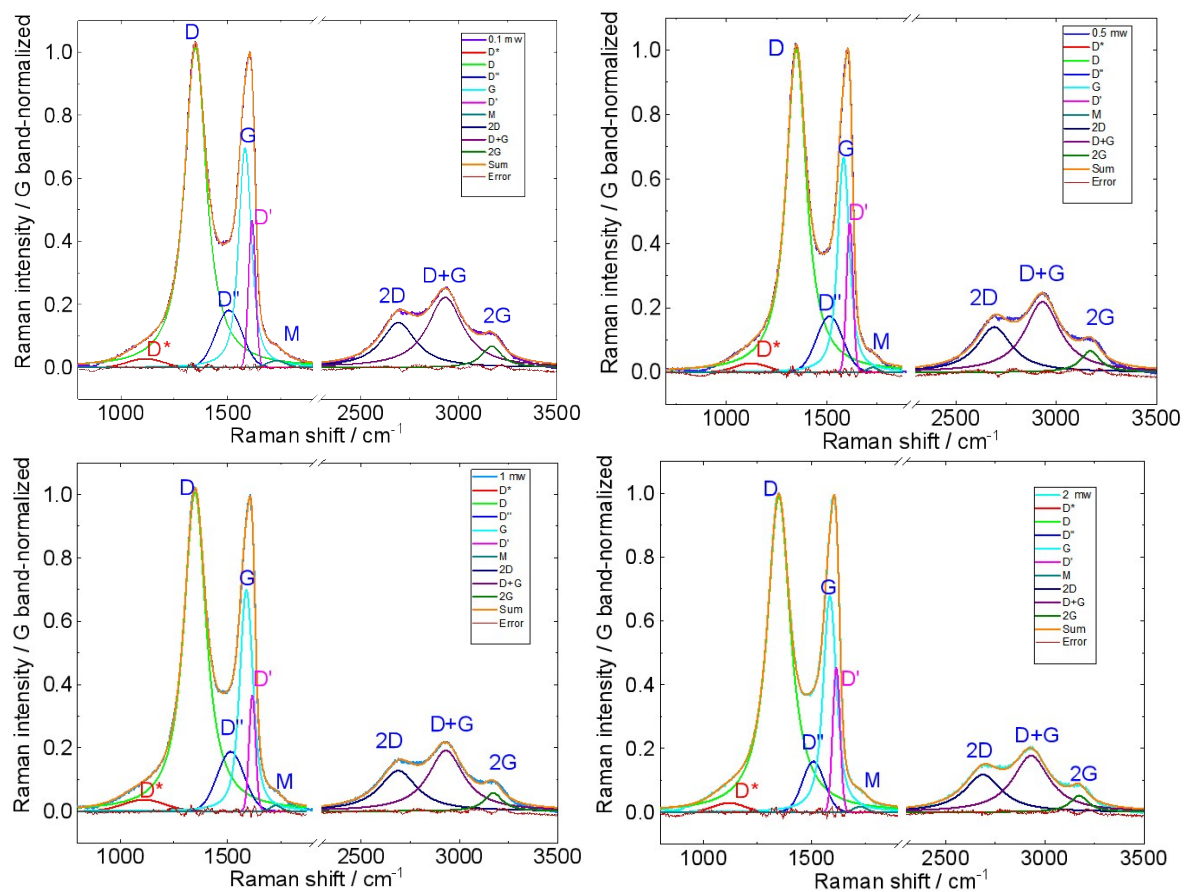

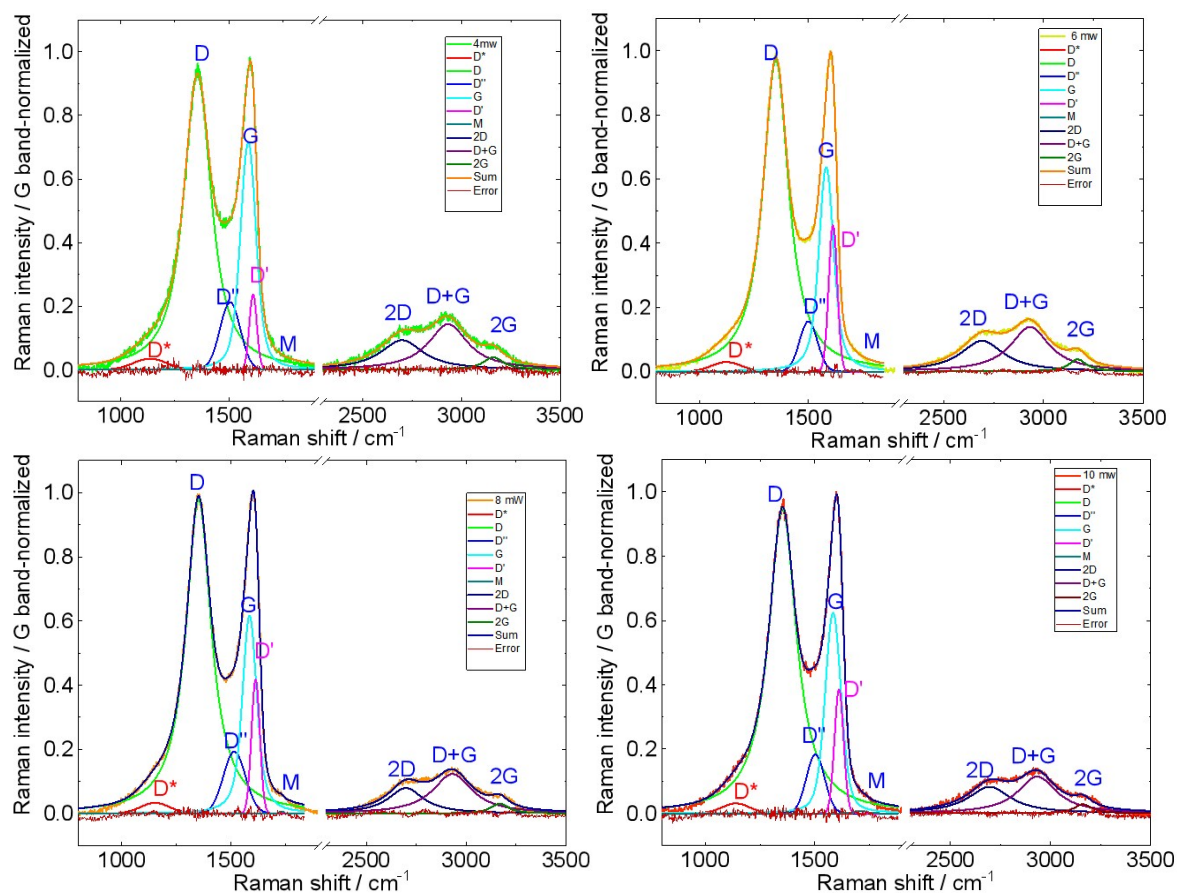

**Figure S5.** Raman spectra of rGO reduced with different powers

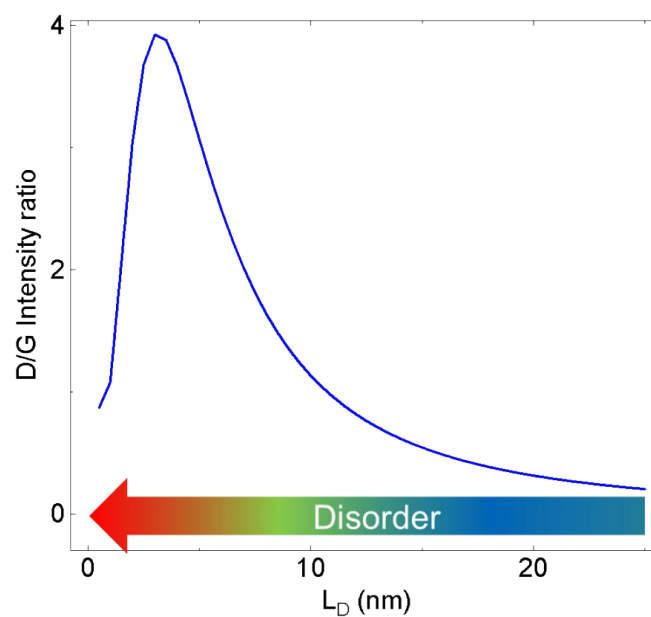

**Figure S6.** D / G ratio as a function of  $\text{sp}^2$  domain size for the case of single layer graphene. Figure adapted from results reported in reference.<sup>44</sup>

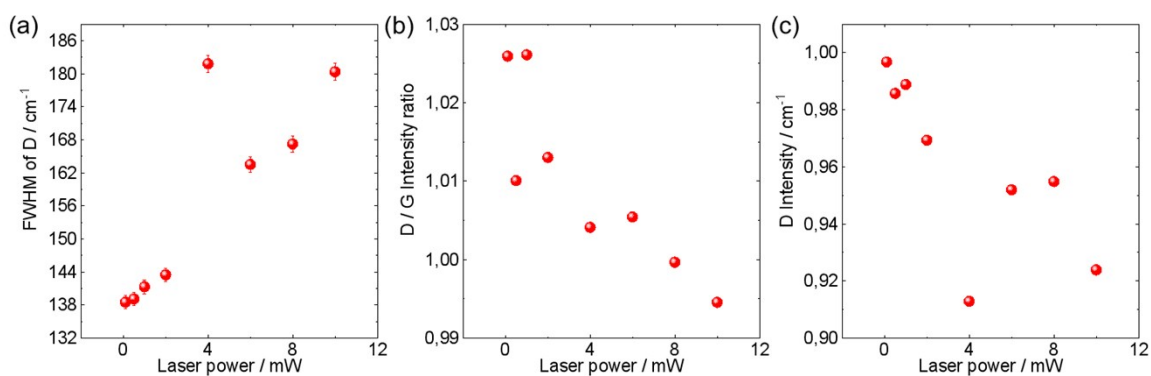

**Figure S7.** (a) D-FWHM of rGO vs. laser power. Notice that the D peak fitting for the GO sample reduced at 4 mW laser power shows a larger error which makes this point discontinuous in comparison to the other points obtained at any other laser power. (b) D/G ratio of rGO vs. laser power. (c) D band intensity vs. laser power
